# Supplementary material
Source: publisher site journal article supplement (https://www.degruyterbrill.com/publication/isbn/9783486592870/downloadAsset/9783486592870_Buchinformation.pdf)
Supplement: Supplementary file 1 [file 9783486592870_Buchinformation.pdf]

## Betriebliche Prozesse optimieren

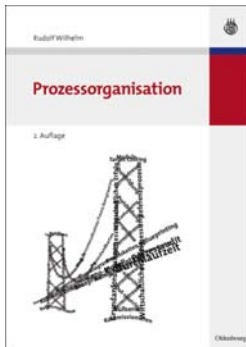

Rudolf Wilhelm

### Prozessorganisation

2. Auflage 2007 I XII I 264 S. I Gb.

€ 32,80

ISBN 978-3-486-58302-1

Aus der Reihe *Managementwissen für Studium und Praxis*

In der betrieblichen Praxis ist mittlerweile unumstritten, dass eine systematische Auseinandersetzung mit den Prozessen des Unternehmens unumgänglich ist. Es ist jedoch nicht immer klar, wie diese Erkenntnis richtig umgesetzt werden kann. Hierzu gibt dieses Buch Hilfestellungen: Zunächst werden theoretische und methodische Grundlagen behandelt. Im Mittelpunkt steht dabei, wie betriebliche Prozesse mit verschiedenen Darstellungsmitteln visualisiert werden können. Der Hauptteil des Buchs ist den Kernprozessen gewidmet, die in einem Unternehmen ‚normalerweise‘ stattfinden – Produktplanung, Auftragsannahme, Angebotserstellung, Entwicklung und Fertigung, Konzipierung und Durchführung von Dienstleistungen, Projektabwicklung, Beschaffung und last but not least Bearbeitung von Kundenbeschwerden.

Genau für diese Prozesse werden idealtypische Abläufe vorgestellt.

---

Das Buch richtet sich an Studierende und Dozenten der Betriebswirtschaftslehre, insbesondere mit dem Schwerpunkt Organisation, sowie Studierende des Wirtschaftsingenieurwesens und der Wirtschaftsinformatik. Es ist daneben auch für Praktiker interessant, die sich mit der Gestaltung und Optimierung betrieblicher Prozesse beschäftigen.

---

[oldenbourg.de](http://oldenbourg.de)

Oldenbourg Wissenschaftsverlag I Pressereferat I Rosenheimer Str. 145  
81679 München I Tel.: +49 89 45051-467 I Fax: +49 89 45051-292 I [kutting@oldenbourg.de](mailto:kutting@oldenbourg.de)

Alle Veröffentlichungen des Oldenbourg Verlags sind über den Buchhandel zu beziehen. Bei Lieferung fallen Versandgebühren an.  
Rezensionsexemplare auf Anforderung.
